# Supplementary material for: Inkoo and Sindbis viruses in blood sucking insects, and a serological study for Inkoo virus in semi-domesticated Eurasian tundra reindeer in Norway
Source: PubMed Central journal article supplement (PMC9166600; doi:10.1186/s12985-022-01815-0), 2022-06-03
Supplement: 12985_2022_1815_MOESM1_ESM.pdf [file 12985_2022_1815_MOESM1_ESM.pdf]

| <b>Locations</b>     | <b>Number of total positive/number total tested</b> | <b>Seropositivity rate % (SD)</b> | <b>95% Confidence interval (CI)</b> |
|----------------------|-----------------------------------------------------|-----------------------------------|-------------------------------------|
| <b>All locations</b> |                                                     |                                   |                                     |
| 2013-14              | 109/180                                             | 61                                |                                     |
| 2014-15              | 102/160                                             | 64                                |                                     |
| 2015-16              | 85/140                                              | 61                                |                                     |
| <b>Total period</b>  | <b>296/480</b>                                      | <b>62* (2.1)</b>                  | <b>59.6-64.4</b>                    |
| <b>Tana</b>          |                                                     |                                   |                                     |
| 2013-14              | 12/20                                               | 60                                |                                     |
| 2014-15              | 6/20                                                | 30                                |                                     |
| 2015-16              | 6/20                                                | 30                                |                                     |
| <b>2013-16</b>       | <b>24/60</b>                                        | <b>40* (17.3)</b>                 | <b>20.4-59.6</b>                    |
| <b>Lakselv</b>       |                                                     |                                   |                                     |
| 2013-14              | 10/20                                               | 50                                |                                     |
| 2014-15              | 13/20                                               | 65                                |                                     |
| 2015-16              | 17/20                                               | 85                                |                                     |
| <b>2013-16</b>       | <b>40/60</b>                                        | <b>67* (17.6)</b>                 | <b>46.8-86.5</b>                    |
| <b>Tromsø</b>        |                                                     |                                   |                                     |
| 2013- 14             | 13/21                                               | 62                                |                                     |
| 2014- 15             | 12/20                                               | 60                                |                                     |
| 2015-16              | 16/20                                               | 80                                |                                     |
| <b>2013-16</b>       | <b>41/61</b>                                        | <b>67* (11.0)</b>                 | <b>54.9-79.8</b>                    |
| <b>Lødingen</b>      |                                                     |                                   |                                     |
| 2013-14              | 12/22                                               | 55                                |                                     |
| 2014-15              | 15/20                                               | 75                                |                                     |
| 2015-16              | Nd                                                  | Nd                                |                                     |
| <b>2013-16</b>       | <b>27/42</b>                                        | <b>64* (14.1)</b>                 | <b>45.4-84.6</b>                    |
| <b>Hattfjelldal</b>  |                                                     |                                   |                                     |
| 2013-14              | 18/30                                               | 60                                |                                     |
| 2014-15              | 12/20                                               | 60                                |                                     |
| 2015-16              | 13/20                                               | 65                                |                                     |
| <b>2013-16</b>       | <b>43/70</b>                                        | <b>61* (2.9)</b>                  | <b>58.4-64.9</b>                    |
| <b>Fosen</b>         |                                                     |                                   |                                     |
| 2013-14              | 13/20                                               | 65                                |                                     |
| 2014-15              | 18/20                                               | 90                                |                                     |
| 2015-16              | 9/20                                                | 45                                |                                     |
| <b>2013-16</b>       | <b>40/60</b>                                        | <b>67* (22.6)</b>                 | <b>41.2-92.2</b>                    |
| <b>Røros</b>         |                                                     |                                   |                                     |
| 2013-14              | 16/22                                               | 73                                |                                     |
| 2014-15              | 13/20                                               | 65                                |                                     |
| 2015-16              | 12/20                                               | 60                                |                                     |
| <b>2013-16</b>       | <b>41/62</b>                                        | <b>66* (6.6)</b>                  | <b>58.6-73.4</b>                    |
| <b>Valdres</b>       |                                                     |                                   |                                     |
| 2013-14              | 15/25                                               | 60                                |                                     |
| 2014-15              | 13/20                                               | 65                                |                                     |
| 2015-16              | 12/20                                               | 60                                |                                     |

---

**2013-16**

40/65

62\* (2.9)

58.4-64.9

---
